# Supplementary material
Source: publisher figshare collection journal article supplement (https://diabetesjournals.figshare.com/ndownloader/files/34907760)
Supplement: Supplementary file 1 [file 34907760]

**Supplementary materials
Supplementary TABLE S1. Reasons for not Using Glucagon During Most Recent Severe Hypoglycemic Event**

|  | **T1D PWD** | **T2D PWD** | **T1D CGs** | **T2D CGs** | **All T1D** | **All T2D** | **Total** | ***P*** |
| --- | --- | --- | --- | --- | --- | --- | --- | --- |
|  | **(*n* = 100)** | **(*n* = 104)** | **(*n* = 103)** | **(*n* = 94)** | **(*n* = 203)** | **(*n* = 198)** | **(*n* = 401)** |
| Glucagon not available | 20 (20.0) | 18 (17.3) | 19 (18.4) | 9 (9.6) | 39 (19.2) | 27 (13.6) | 66 (16.5) | Omnibus: 0.2121 |
| Glucagon expired | 2 (2.0) | 0 (0.0) | 3 (2.9) | 1 (1.1) | 5 (2.5) | 1 (0.5) | 6 (1.5) | Omnibus: 0.3514 |
| Did not have a prescription | 38 (38.0) | 68 (65.4) | 24 (23.3) | 32 (34.0) | 62 (30.5) | 100 (50.5) | 162 (40.4) | Omnibus: <0.0001 PWD†: <0.0001CGs‡: 0.0950 |
| Unaware of glucagon | 3 (3.0) | 6 (5.8) | 10 (9.7) | 36 (38.3) | 13 (6.4) | 42 (21.2) | 55 (13.7) | Omnibus: <0.0001 PWD†: 0.3356  CGs‡: <0.0001 |
| Glucagon available, but other treatment worked | 20 (20.0) | 8 (7.7) | 33 (32.0) | 1 (1.1) | 53 (26.1) | 9 (4.5) | 62 (15.5) | Omnibus: <0.0001 PWD†: 0.0107  CGs‡: <0.0001 |
| Glucagon available, but ambulance was called | 2 (2.0) | 1 (1.0) | 1 (1.0) | 1 (1.1) | 3 (1.5) | 2 (1.0) | 5 (1.2) | Omnibus: 0.8921 |
| Glucagon available, but went to hospital instead | 0 (0.0) | 0 (0.0) | 1 (1.0) | 0 (0.0) | 1 (0.5) | 0 (0.0) | 1 (0.2) | Omnibus: 0.4072 |
| Alone when the severe low blood sugar event occurred | 7 (7.0) | 3 (2.9) | 3 (2.9) | 4 (4.3) | 10 (4.9) | 7 (3.5) | 17 (4.2) | Omnibus: 0.4245 |
| Data are n (%). *P* values are from χ2 test. †PWD T1D vs T2D. ‡CGs T1D vs T2D. Multiple answers were permitted. CGs, caregivers; PWD, people with diabetes; T1D, type 1 diabetes; T2D, type 2 diabetes. | | | | | | | | |
